# Supplementary material for: A Systematic Review and Meta-Analysis of the Efficacy of Physical Activity Interventions among University Students
Source: MDPI journal article supplement (doi:10.3390/su16041369), 2024-02-06
Supplement: s1 [file s1]

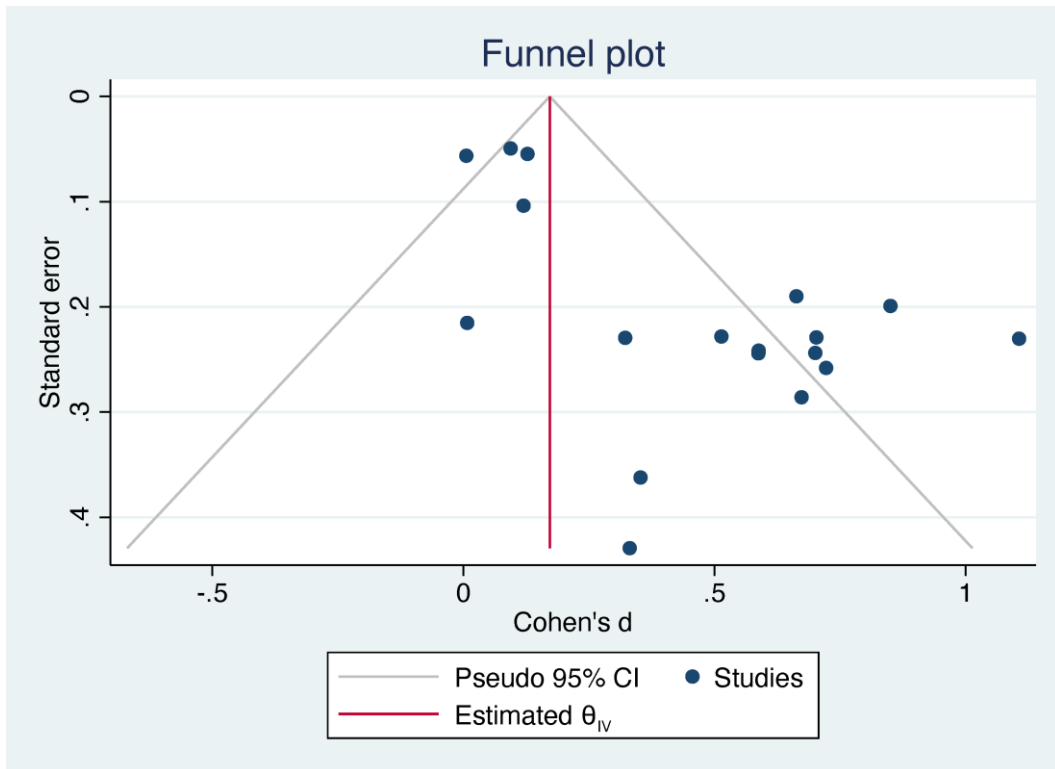

**Figure S1.** Funnel plot.

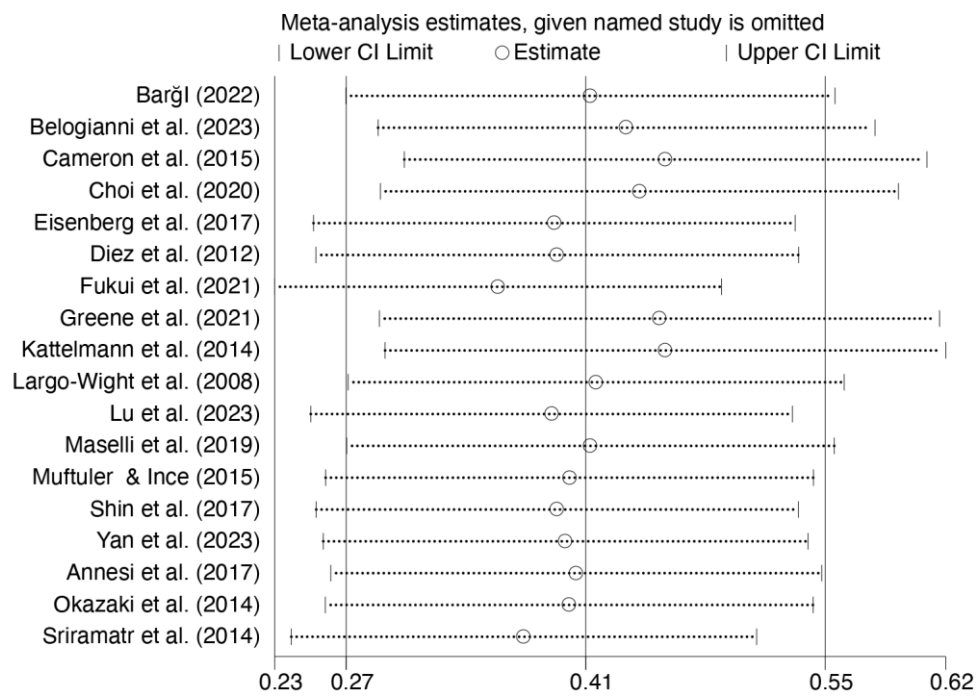

**Figure S2.** Sensativity Analysis- TPA.

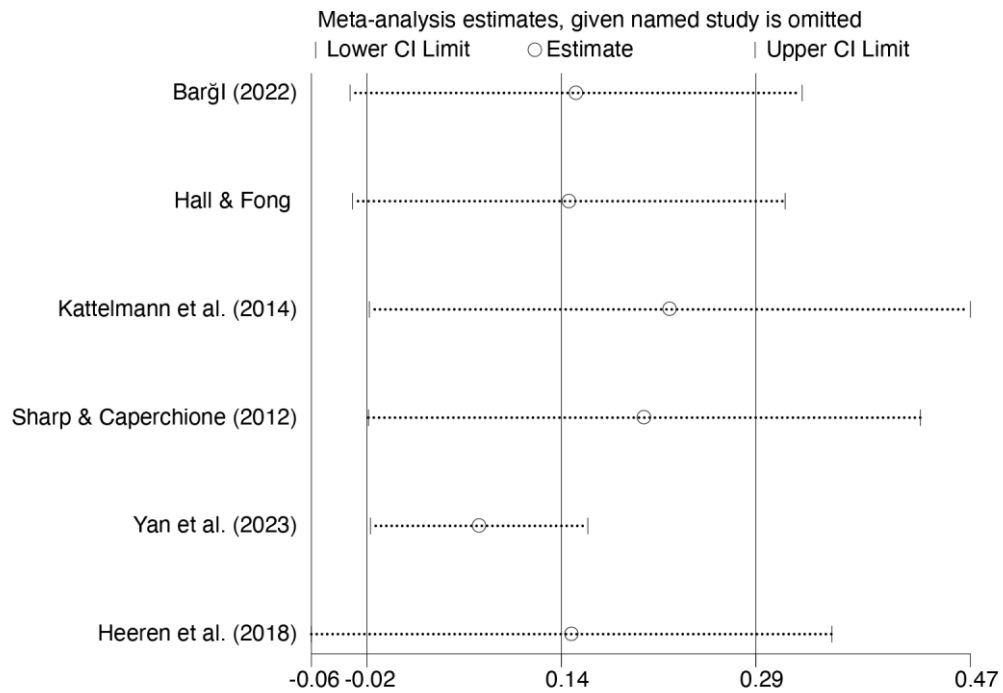

**Figure S3.** Sensativity Analysis- VPA.

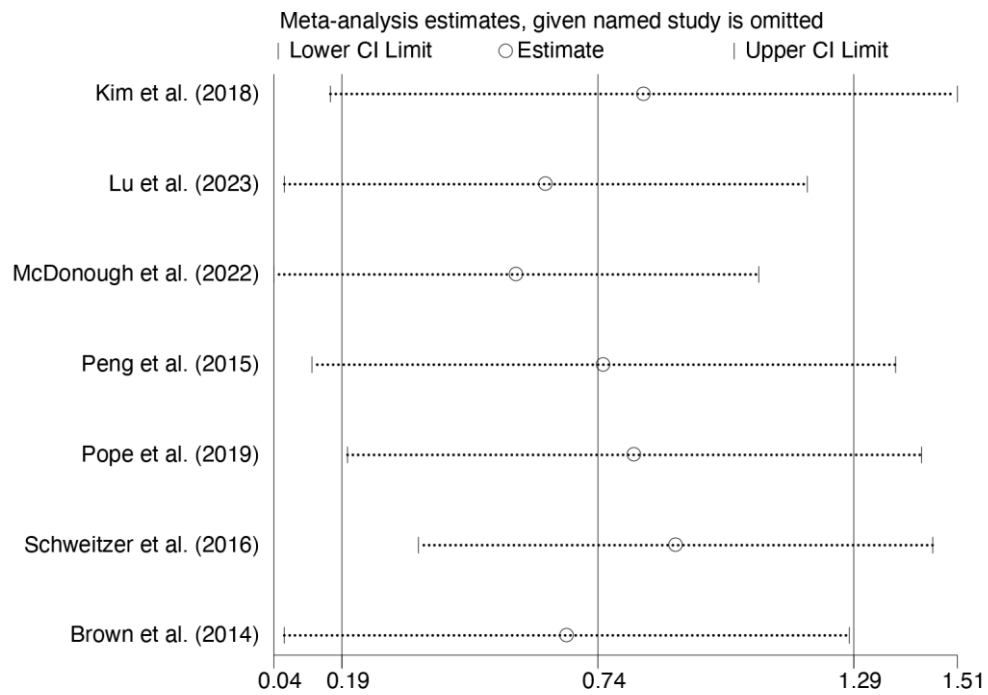

**Figure S4.** Sensativity Analysis- MVPA.

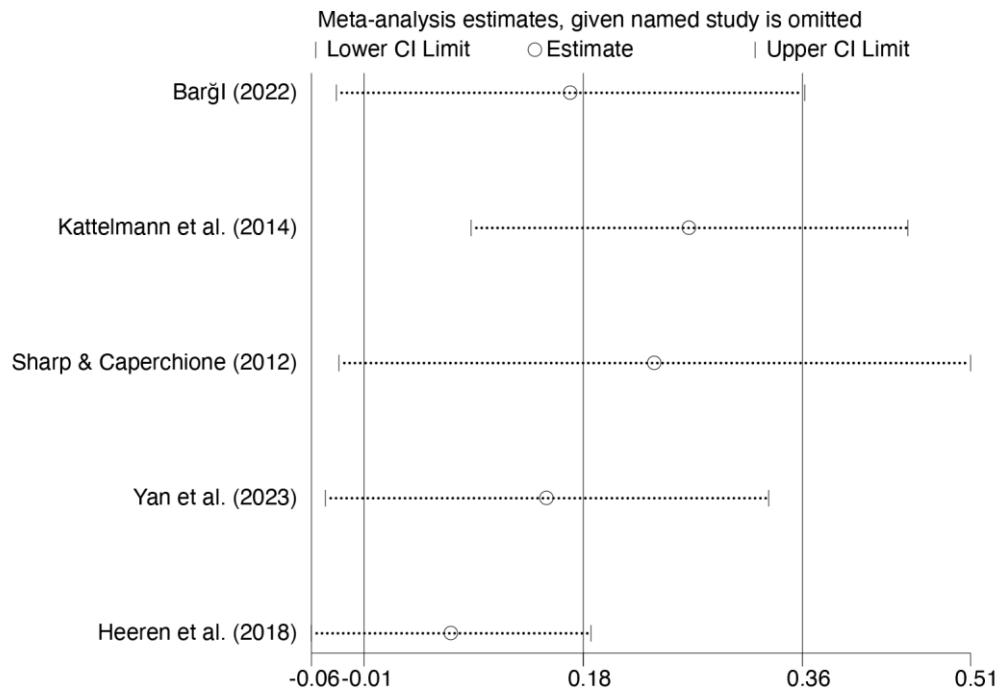

**Figure S5.** Sensativity Analysis-MPA.

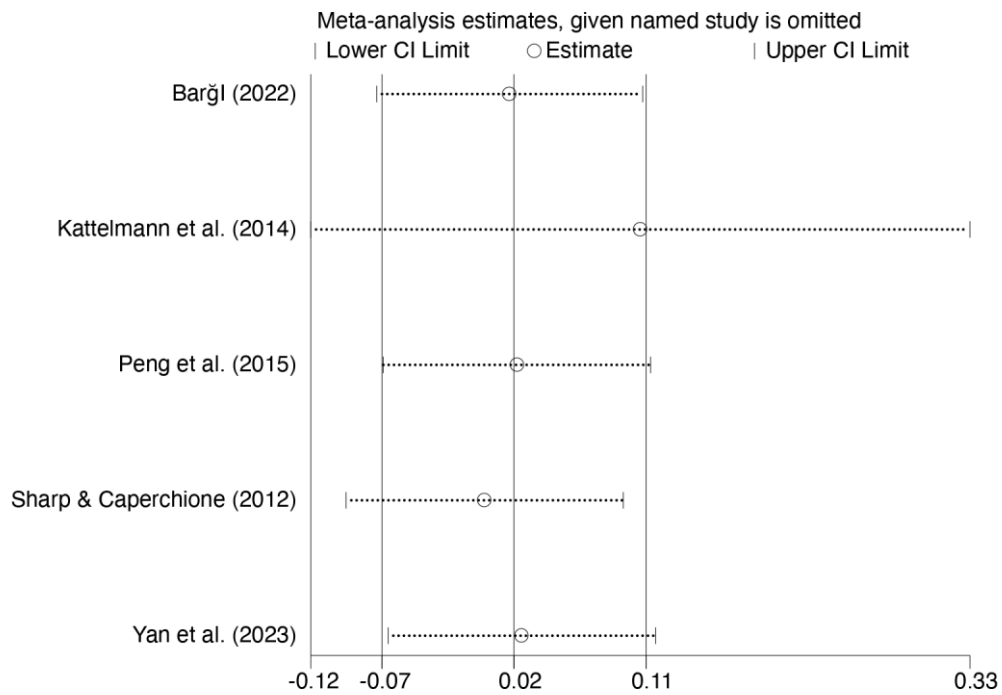

**Figure S6.** Sensativity Analysis – LPA.

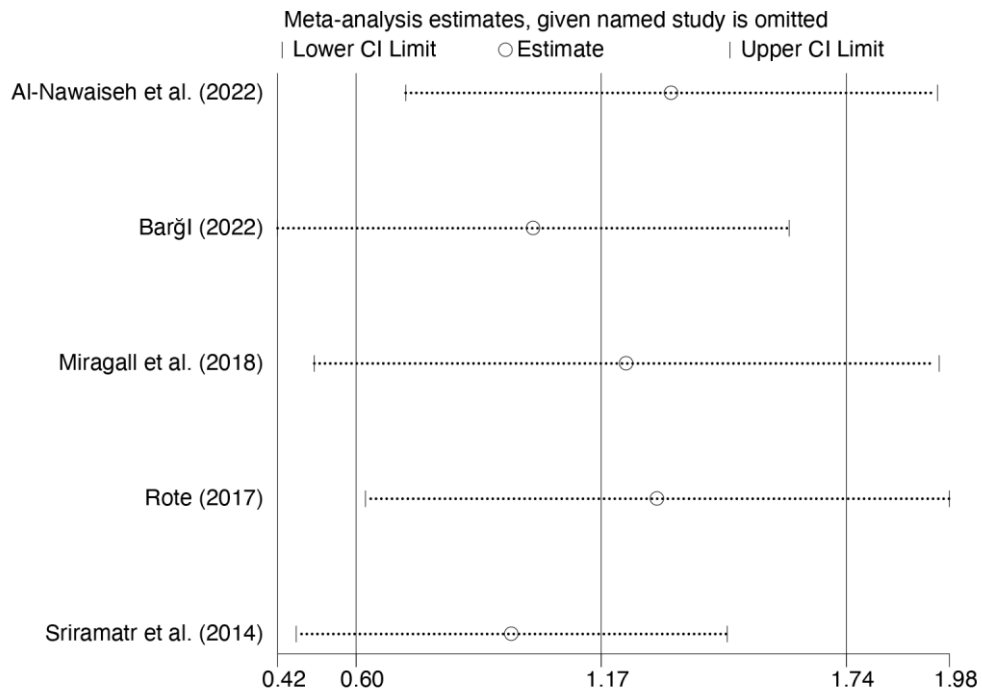

**Figure S7.** Sensativity Analysis- Step.

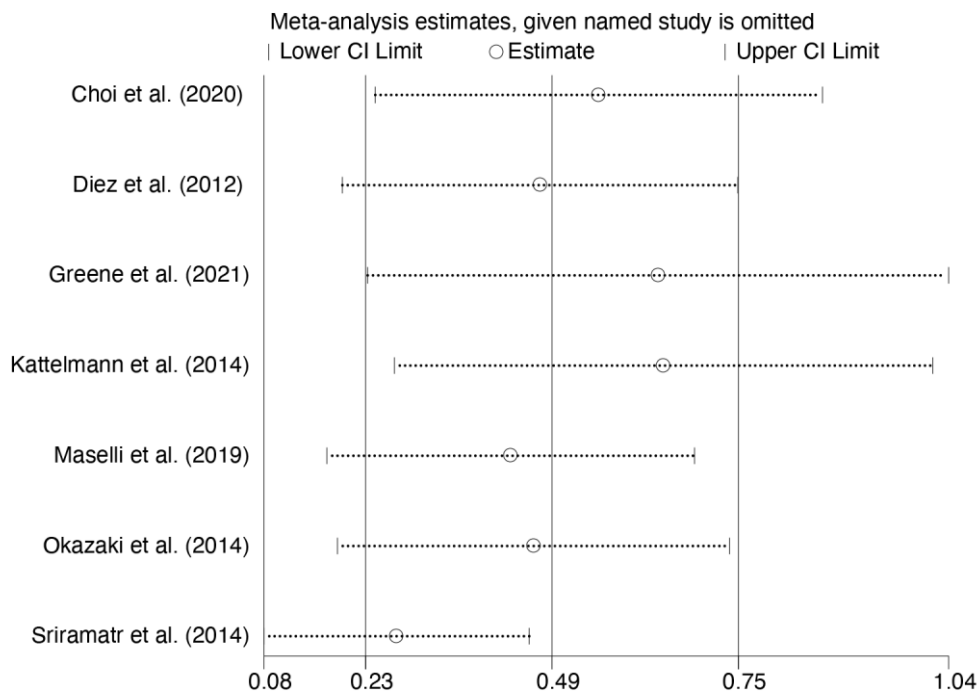

**Figure S8.** Sensativity Analysis - Follow-up.
